# Supplementary material for: Zinc Oxide Nanoparticle Inhibits Tumorigenesis of Renal Cell Carcinoma by Modulating Lipid Metabolism Targeting miR-454-3p to Repressing Metabolism Enzyme ACSL4
Source: Hindawi journal article supplement (doi:10.1155/2022/2883404), 2022-03-25
Supplement: f1 [file 2883404.f1.pdf]

**Table S1 Characteristics of 42 RCC patients**

| Parameter            | Total | ACSL4 high | ACSL4 low |
|----------------------|-------|------------|-----------|
| <b>Age</b>           |       |            |           |
| <60                  | 6     | 4          | 2         |
| ≥ 60                 | 36    | 17         | 19        |
| <b>Gender</b>        |       |            |           |
| Female               | 8     | 3          | 5         |
| Male                 | 34    | 18         | 16        |
| <b>TNM stage</b>     |       |            |           |
| I                    | 22    | 10         | 12        |
| II-III               | 20    | 11         | 9         |
| <b>Fuhrman grade</b> |       |            |           |
| 1+2                  | 25    | 11         | 14        |
| 3+4                  | 17    | 10         | 7         |
